# Supplementary material for: Arid5a regulates naive CD4+ T cell fate through selective stabilization of Stat3 mRNA
Source: PubMed Central journal article supplement — J Exp Med. 2016 Apr 4;213(4):605–19. doi: 10.1084/jem.20151289 (PMC4821647; doi:10.1084/jem.20151289), 2016-04-04
Supplement: supp_jem.20151289_JEM_20151289_sm.pdf [file supp_jem.20151289_JEM_20151289_sm.pdf]

SUPPLEMENTAL MATERIAL

Masuda et al., <http://www.jem.org/cgi/content/full/jem.20151289/DC1>

## Mus musculus: NM\_213659

902 

ccccttcca tgtcaaagg ccctctgtcc tgcttctatt gggaatccct gcctcaggac  
 cttgtgtcga gagggattgc cttacagggt tgaacctgcc tcagactaca ggcctcagc  
 aaagctcagg gagtatggtc cttattctat gcgcttgggt cccagggata tctgtaacca  
 cagggcaaaa gctgacatat actccaggtc tgccctcata tgagtgggtg attcttggcc  
 tcccctgaga ctggcaactg tctgctcccc attgggtctc ccaggtgagg tggaacacag  
 ttctgcacc tactgtggcc tccatgtcgc ttgcttgctt cgctcactca gcttactgga  
 aactgagtg ttcaaggcaa gcctttctg acagaggcat ggctagattc agtgactcaa  
 agccacctca ttcagctgat cagtgtctgt ggaattgttt ccttccagtt aaccagtgct  
 tgaattaagg gcagtgagga cattgtctcc aagacgaact gcttgccttg accaccccag

1449   1458

ccttctgctt cgagacagtt actgctctcc **cacccatca atgttcttta gttatacaat**  
**aagctgaact tataaactga aagggtatt aggaaggcaa ggcttgggca ttttatggc**  
**ttcaatcct ggggaccag gaacaagggt agggctctc tggggctggt gttgtacctc**  
**aggggctctg ggaagtctgt gtgcttgggt taaccacca tagtgagccc ctggaactgc**

1698 

ccacttccc tctcctggc cccactggc cccagcctca cccagcctgc agactgctta

1773 

gcctttcagt **gcagtggctt gtgtctggc cactgcactc** agattccaat gtaaacttc

 1792

tagtgtaaaa **atttatatta** ttgtgggttg tttttgtg ttgttggtt ttgtatattg  
 ctgtaactac ttaactcc agaaataaag attatatagg aactgctc 

1895 

 The responsive elements for Arid5a and Reg-1

 mouse stem-loop

**attta** : AUUUA pentamar

Figure S1. Sequence of the mouse STAT3 3'UTR (902–1895). The compartment of the STAT3 3'UTR (902–1458), (1449–1792), (1698–1895), or (1773–1895) was indicated at the arrow in green, red, blue, or brown, respectively.

Table S1. **Comparison of STAT3- or STAT1-controlling gene expression between Arid5a-deficient T cells and WT T cells under Th17 cell conditions**

| Gene symbol  | Gene expression (relative) |
|--------------|----------------------------|
| KO/WT        |                            |
| <i>Stat3</i> | -3.3                       |
| <i>Rora</i>  | -2.6                       |
| <i>Rorc</i>  | -2.3                       |
| <i>Batf</i>  | -2.3                       |
| <i>Ifny</i>  | 1.2                        |
| <i>Icos</i>  | 1.2                        |
| <i>Tbx21</i> | 1.3                        |
| <i>Stat1</i> | 1.3                        |
| <i>Irf1</i>  | 1.4                        |
| <i>Il10</i>  | 3.1                        |
| <i>Maf</i>   | 3.9                        |

Gene expression analysis of CD4<sup>+</sup> Arid5a-deficient T cells or WT T cells differentiated for 48 h under Th17-polarizing conditions. Level of gene expression in Arid5a-deficient T cells was compared to that in WT T cells. Data are representative of three independent experiments. If KO/WT < 1, the value was shown in (WT/KO).
